# Supplementary material for: Oxygen doped graphitic carbon nitride nanosheets for the degradation of organic pollutants by activating hydrogen peroxide in the presence of bicarbonate in the dark
Source: Royal Society of Chemistry journal article supplement (doi:10.1039/d0ra07893j), 2020-12-24
Supplement: d0ra07893j1.pdf [file d0ra07893j1.pdf]

## Support Materials

### **Oxygen Doped Graphitic Carbon Nitride Nanosheets for the Degradation of Organic Pollutants by Activating Hydrogen Peroxide in the Presence of Bicarbonate in the Dark**

Tian-Jiao Jiang <sup>a,1</sup>, Chao Xie <sup>a,1</sup>, Huai-De Peng <sup>a</sup>, Bo Lei <sup>a</sup>, Qing-Qing Chen <sup>a</sup>, Gang Li <sup>a</sup>, Cai-Wu Luo <sup>a, b, c, d, \*</sup>

<sup>a</sup>School of Resource Environmental and Safety Engineering, University of South China 421000, China

<sup>b</sup>State Key Laboratory of Safety and Health for Metal Mines, Sinosteel Maanshan General Institute of Mining Research Co., Ltd 243000, China

<sup>c</sup>Key Laboratory of Clean Energy Material, LongYan University 364012, China

<sup>d</sup>Research Center for Eco-Environmental Sciences, Chinese Academy of Sciences 100085, China

<sup>1</sup> They contributed equally to this work;

\* Corresponding author: Cai-Wu Luo.

Tel: +86-734-8282345;

E-mail addresses: [luocaiwu00@126.com](mailto:luocaiwu00@126.com).

**Figure S1**

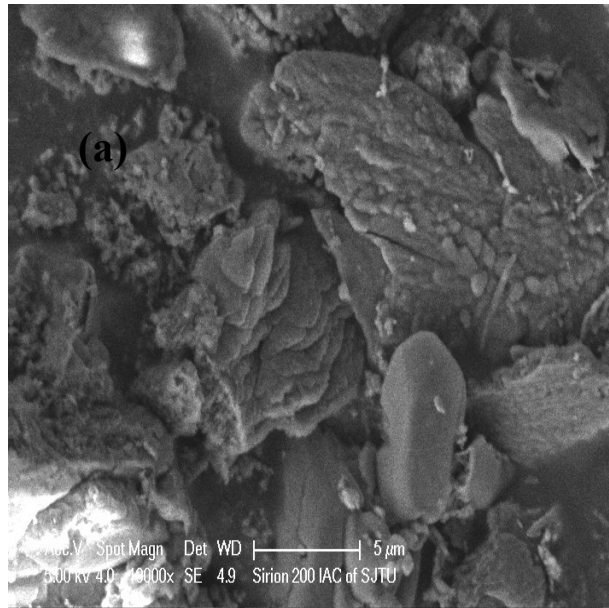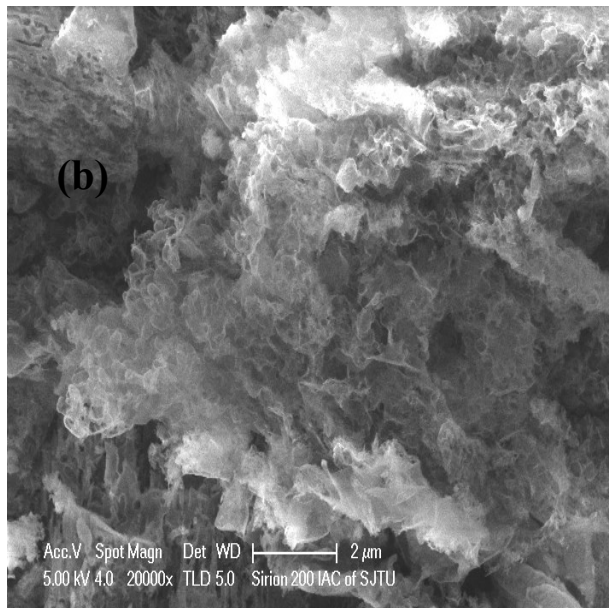

**Figure S1** The SEM images of different catalysts.

(a)  $g\text{-C}_3\text{N}_4$ , (b)  $O/g\text{-C}_3\text{N}_4$ .

**Figure S2**

**(a)**

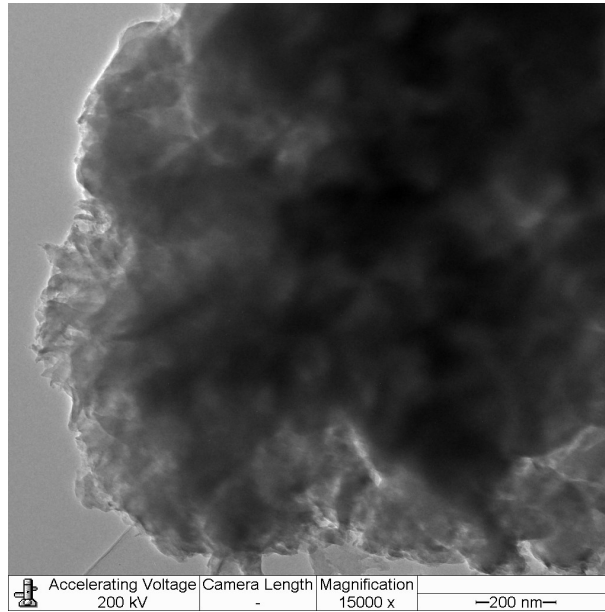

**(b)**

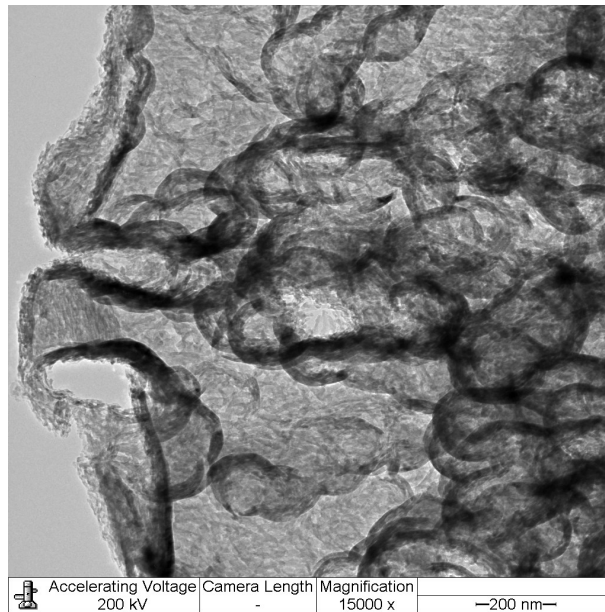

**(b) Figure S2** The TEM images of different catalysts.

(a)  $\text{g-C}_3\text{N}_4$ , (b)  $\text{O/g-C}_3\text{N}_4$ .

**Figure S3**

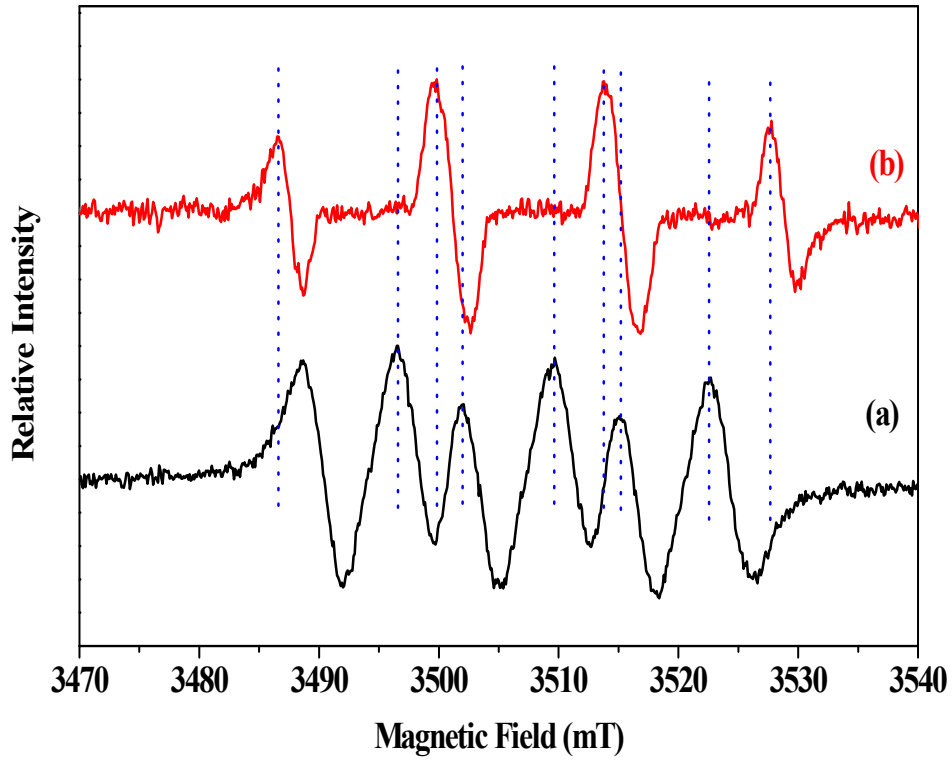

**Figure S3** The EPR spectra of different catalysts.

(a)  $g\text{-C}_3\text{N}_4$ , (b)  $\text{O/g-C}_3\text{N}_4$ .

**Figure S4**

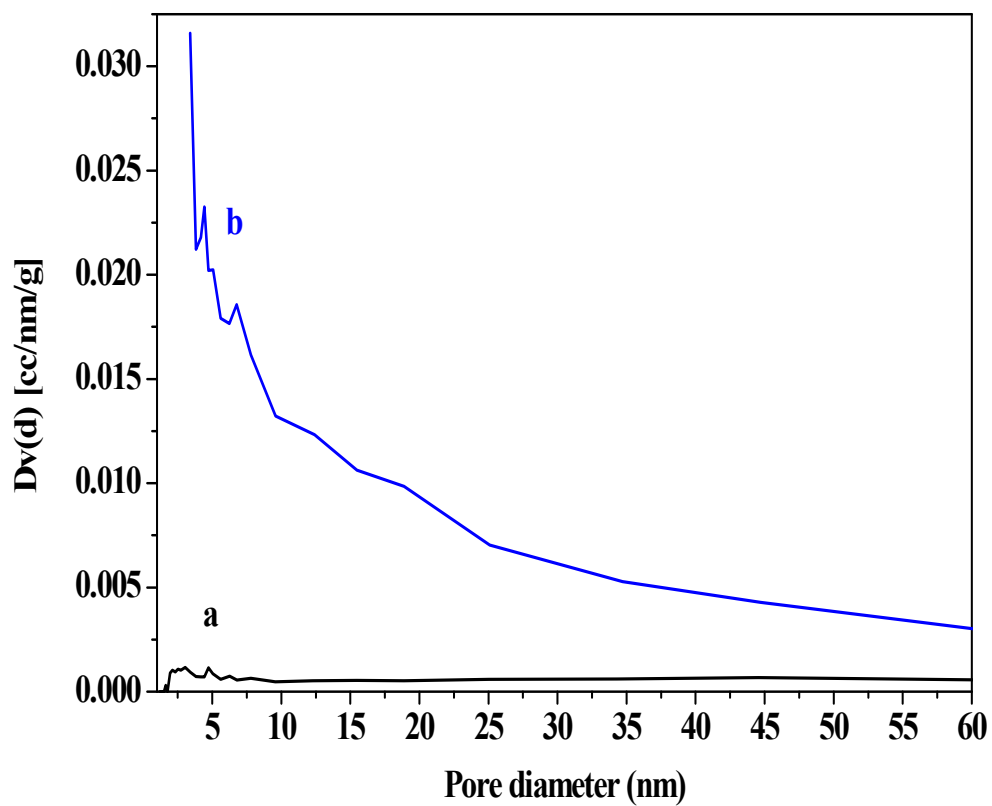

**Figure S4** The pore size distributions of different catalysts (BJH method).

(a) g-C<sub>3</sub>N<sub>4</sub>, (b) O/g-C<sub>3</sub>N<sub>4</sub>.

**Figure S5**

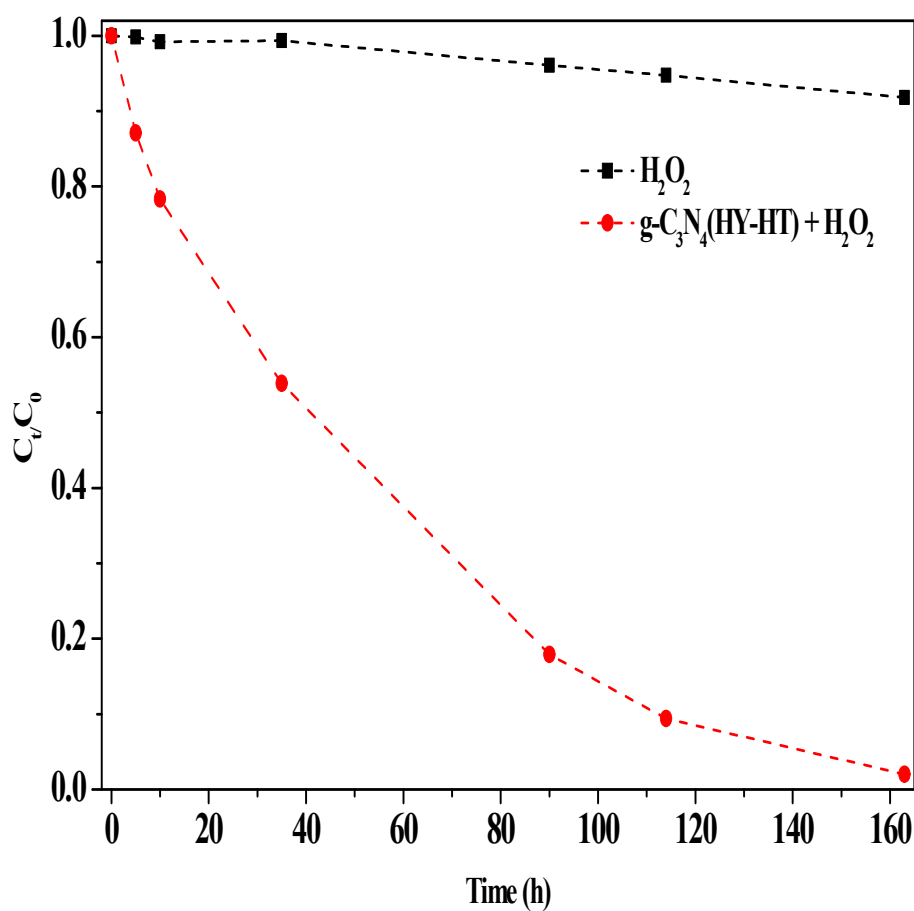

**Figure S5** Effect of reaction time on the removal of RhB in the dark.

Conditions:  $[RhB]_0 = 10 \text{ mg L}^{-1}$ ,  $[H_2O_2] = 36 \text{ mM}$ ,  $[Catal.] = 0.1 \text{ g L}^{-1}$ , initial pH no adjustment and  $25 \text{ }^\circ\text{C}$ .

**Figure S6**

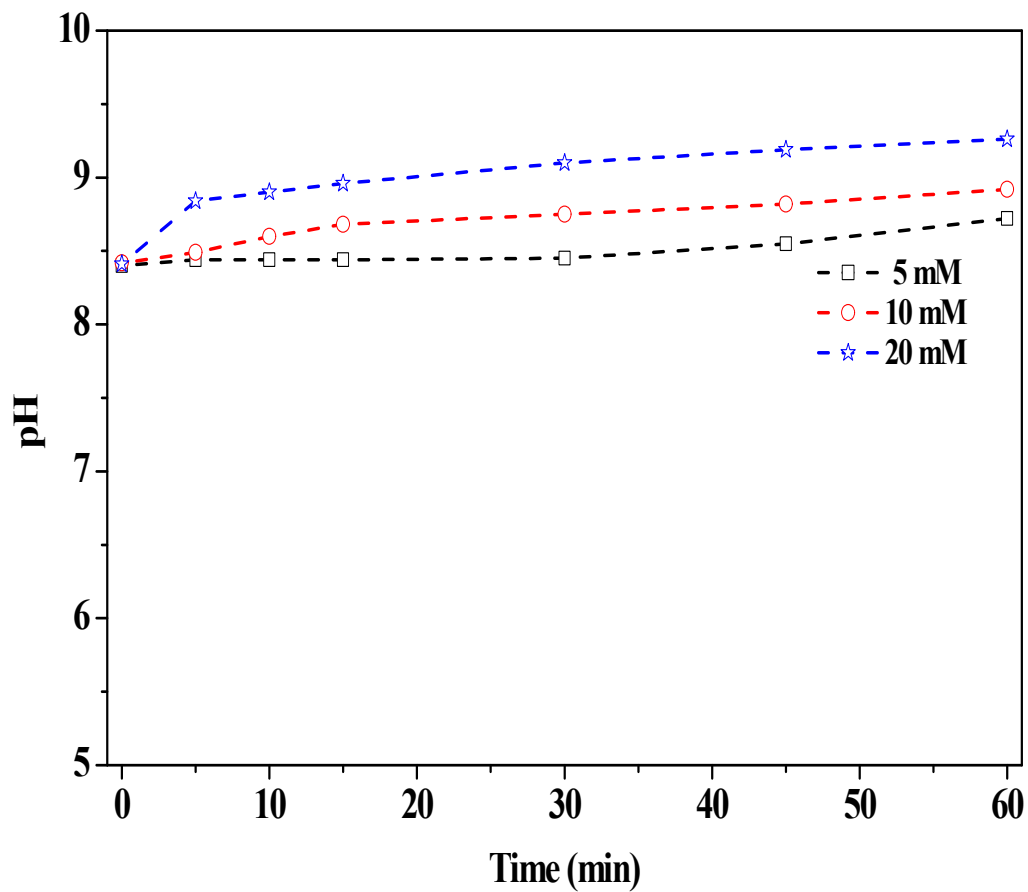

**Figure S6** The change of solution pH with  $\text{HCO}_3^-$  concentration during reaction. Reaction conditions:  $[\text{H}_2\text{O}_2] = 36 \text{ mM}$ ,  $[\text{O/g-C}_3\text{N}_4] = 1.0 \text{ g L}^{-1}$ ,  $[\text{RhB}] = 10 \text{ mg L}^{-1}$ ,  $25^\circ\text{C}$  and 60 min.

**Figure S7**

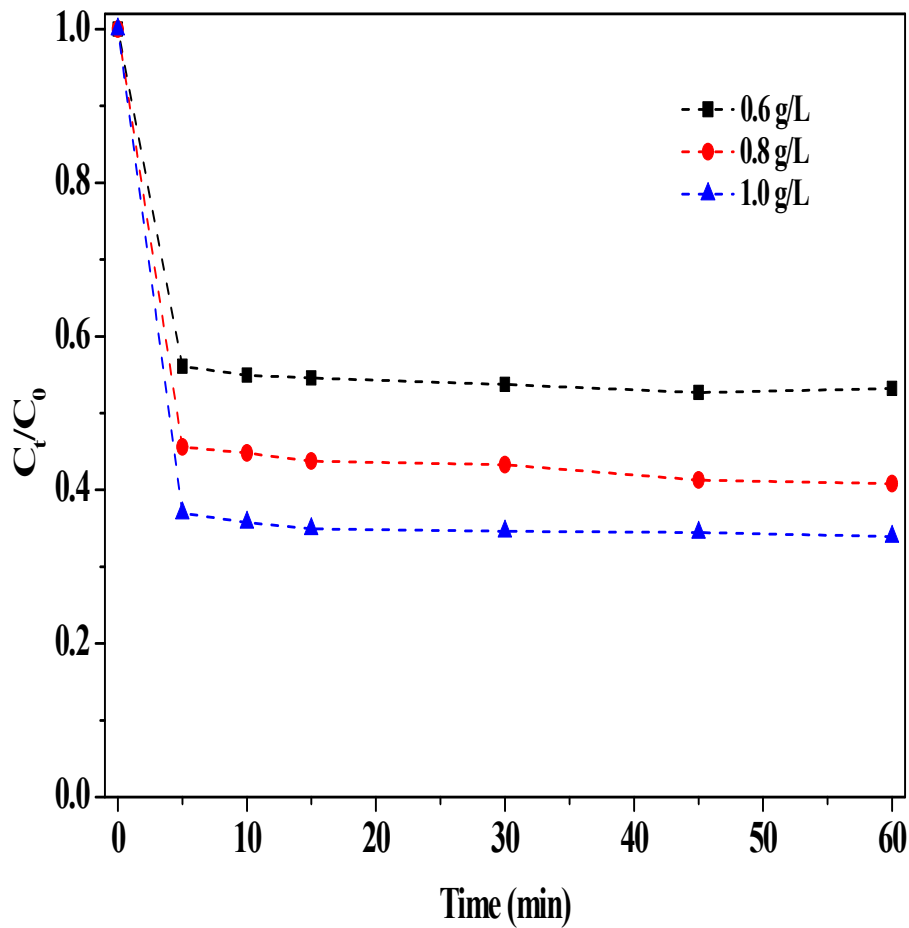

**Figure S7** The effect of the mass of catalyst on the removal of RhB through the absorption. Reaction conditions: [RhB] = 10 mg L<sup>-1</sup>, 25°C and 60 min, [O/g-C<sub>3</sub>N<sub>4</sub>] = 0.6 g L<sup>-1</sup>, 0.8 g L<sup>-1</sup> and 1.0 g L<sup>-1</sup>, respectively.



Figure S8

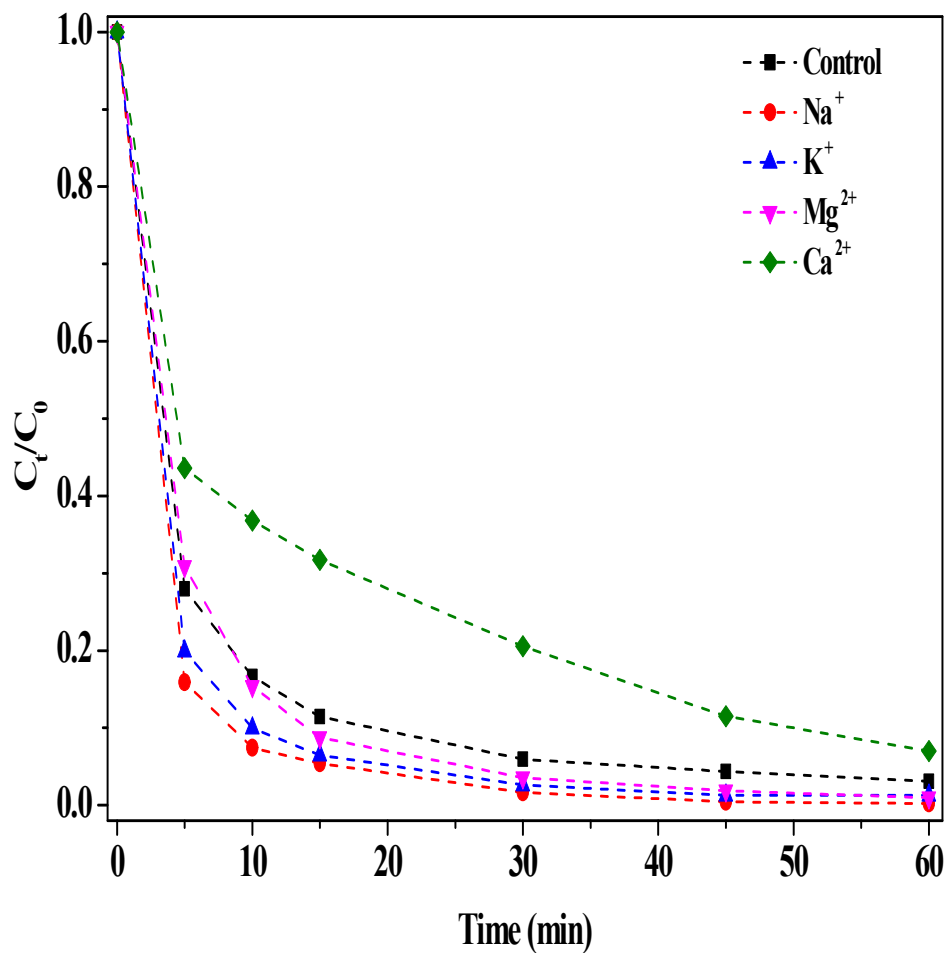

**Figure S8** Effect of various metal ions on the RhB degradation. Reaction conditions:  $[\text{NaHCO}_3] = 10 \text{ mM}$ ,  $[\text{H}_2\text{O}_2] = 15 \text{ mM}$ ,  $[\text{O/g-C}_3\text{N}_4] = 0.8 \text{ g L}^{-1}$ ,  $[\text{Metal ions}] = 100 \text{ mM}$ ,  $[\text{RhB}] = 10 \text{ mg L}^{-1}$ ,  $25 \text{ }^\circ\text{C}$ ,  $\text{pH} \approx 8.4$  and 60 min.

**Figure S9**

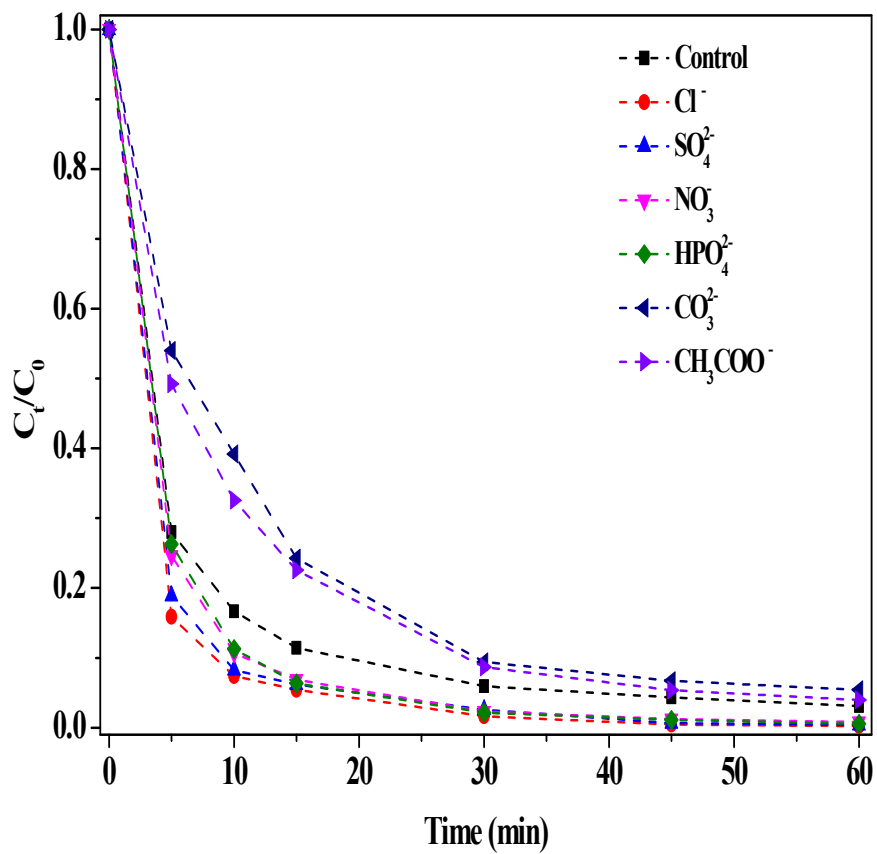

**Figure S9** Effect of various anions on the RhB degradation. Reaction conditions: [NaHCO<sub>3</sub>] = 10 mM, [H<sub>2</sub>O<sub>2</sub>] = 15 mM, [O/g-C<sub>3</sub>N<sub>4</sub>] = 0.8 g L<sup>-1</sup>, [Anions] = 100 mM, [RhB] = 10 mg L<sup>-1</sup>, 25 °C, pH ≈ 8.4 and 60 min.

**Figure S10**

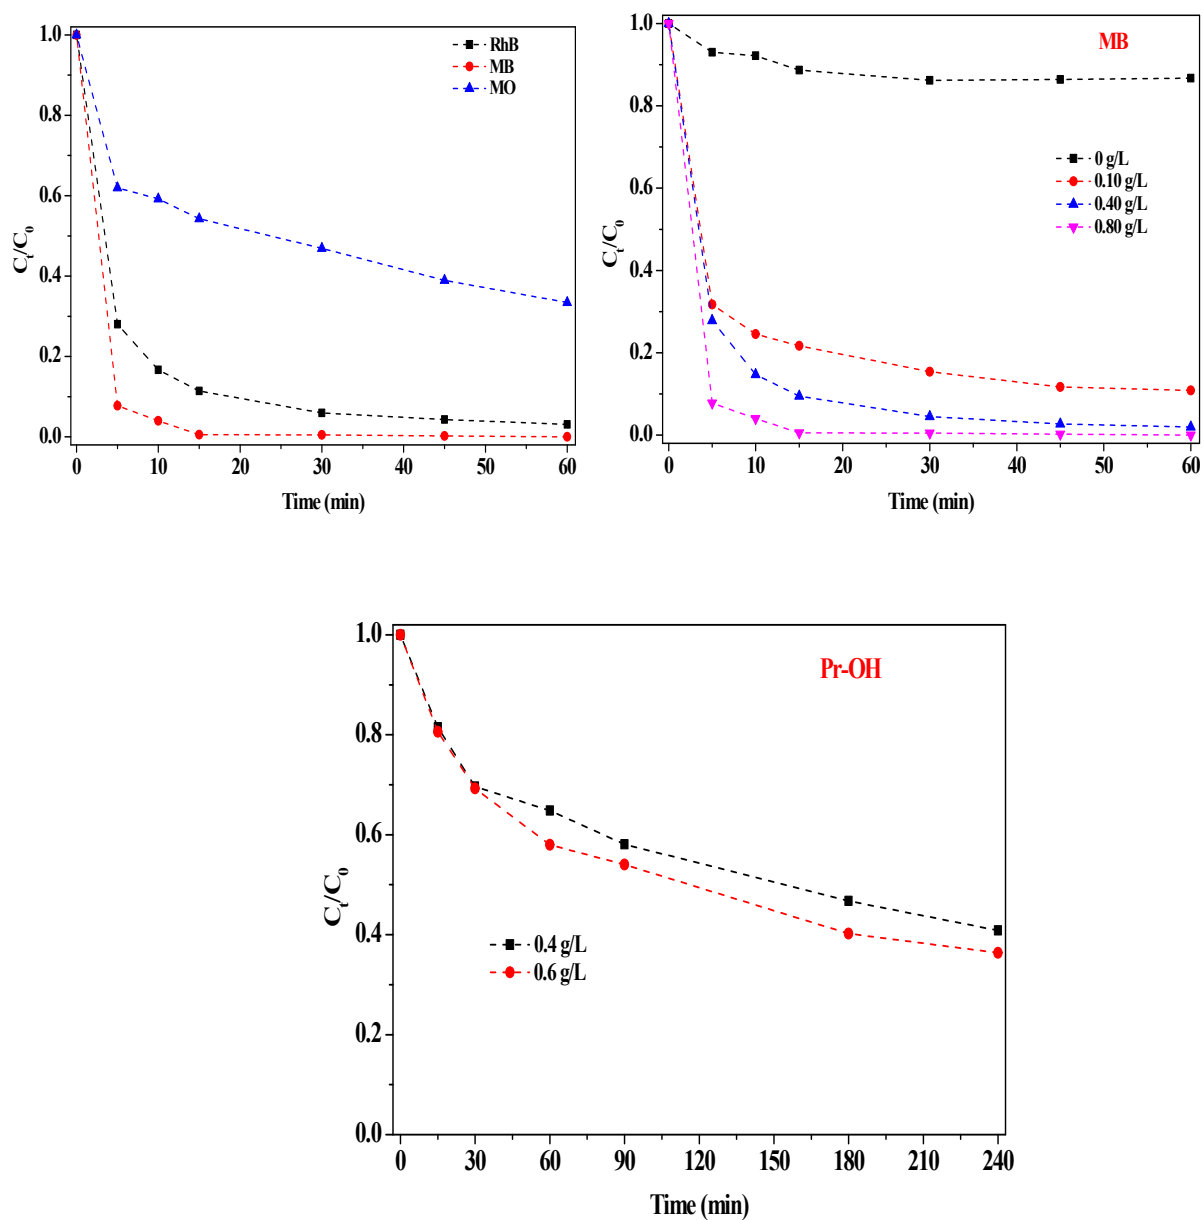

**Figure S10** Effect of other organic pollutants on the degradation. Reaction conditions:  $[NaHCO_3] = 10 \text{ mM}$ ,  $[H_2O_2] = 15 \text{ mM}$ ,  $[O/g-C_3N_4] = 0.8 \text{ g L}^{-1}$ ,  $[Organics] = 10 \text{ mg L}^{-1}$ ,  $25 \text{ }^\circ\text{C}$ ,  $\text{pH} \approx 8.4$  and 60 min.

**Figure S11**

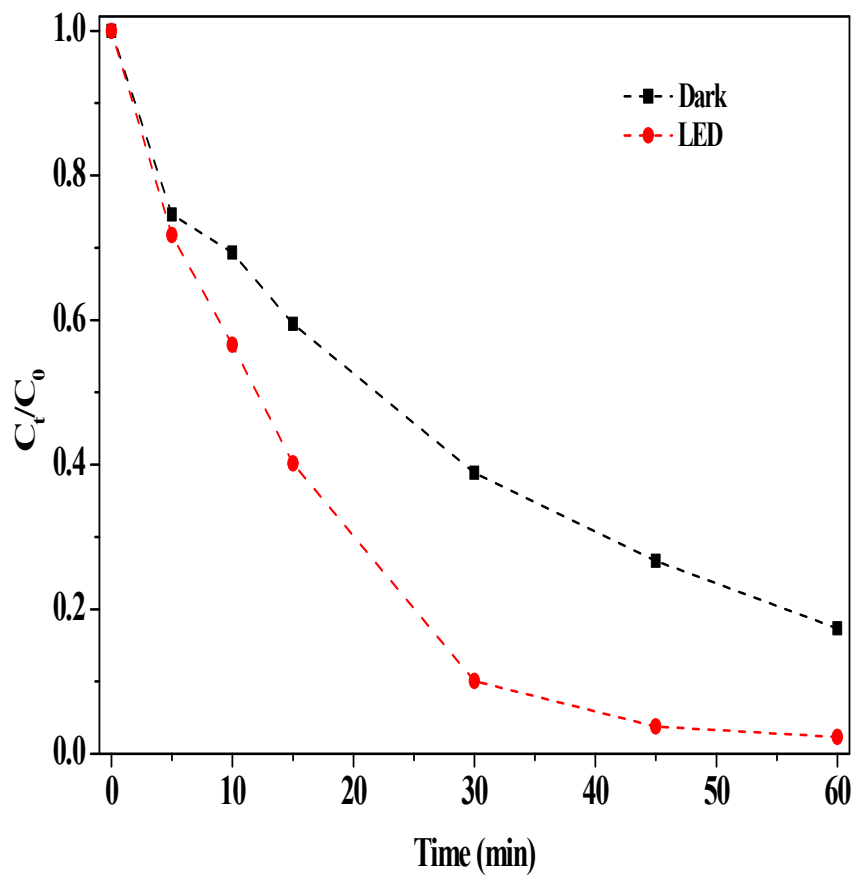

**Figure S11** Comparison results of dark and LED illumination on the RhB degradation. Reaction conditions:  $[\text{NaHCO}_3] = 10 \text{ mM}$ ,  $[\text{H}_2\text{O}_2] = 15 \text{ mM}$ ,  $[\text{O/g-C}_3\text{N}_4] = 0.1 \text{ g L}^{-1}$ ,  $[\text{RhB}] = 10 \text{ mg L}^{-1}$ ,  $25 \text{ }^\circ\text{C}$ ,  $\text{pH} \approx 8.4$  and 60 min.

**Figure S12**

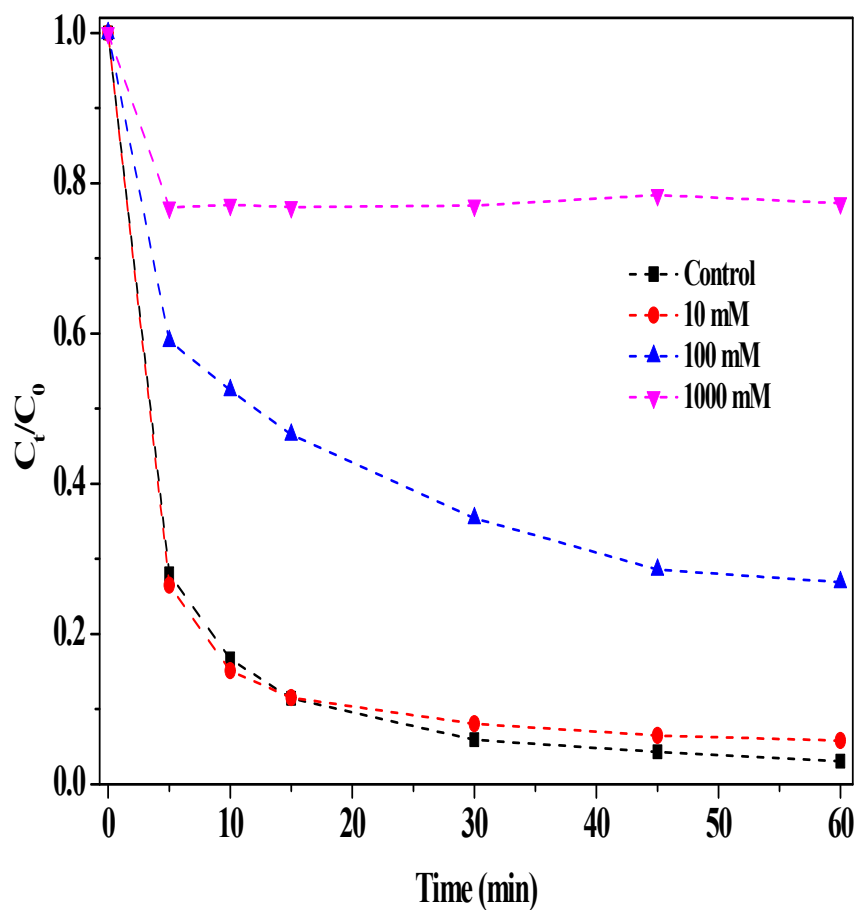

**Figure S12** Effect of concentrations of ascorbic acid on the RhB degradation. Reaction conditions:  $[\text{NaHCO}_3] = 10 \text{ mM}$ ,  $[\text{H}_2\text{O}_2] = 15 \text{ mM}$ ,  $[\text{O/g-C}_3\text{N}_4] = 0.8 \text{ g L}^{-1}$ ,  $[\text{RhB}] = 10 \text{ mg/L}$ ,  $25 \text{ }^\circ\text{C}$ ,  $\text{pH} \approx 8.4$ ,  $60 \text{ min}$ ,  $[\text{Ascorbic acid}] = 10, 100 \text{ and } 1000 \text{ mM}$ , respectively.

**Figure S13**

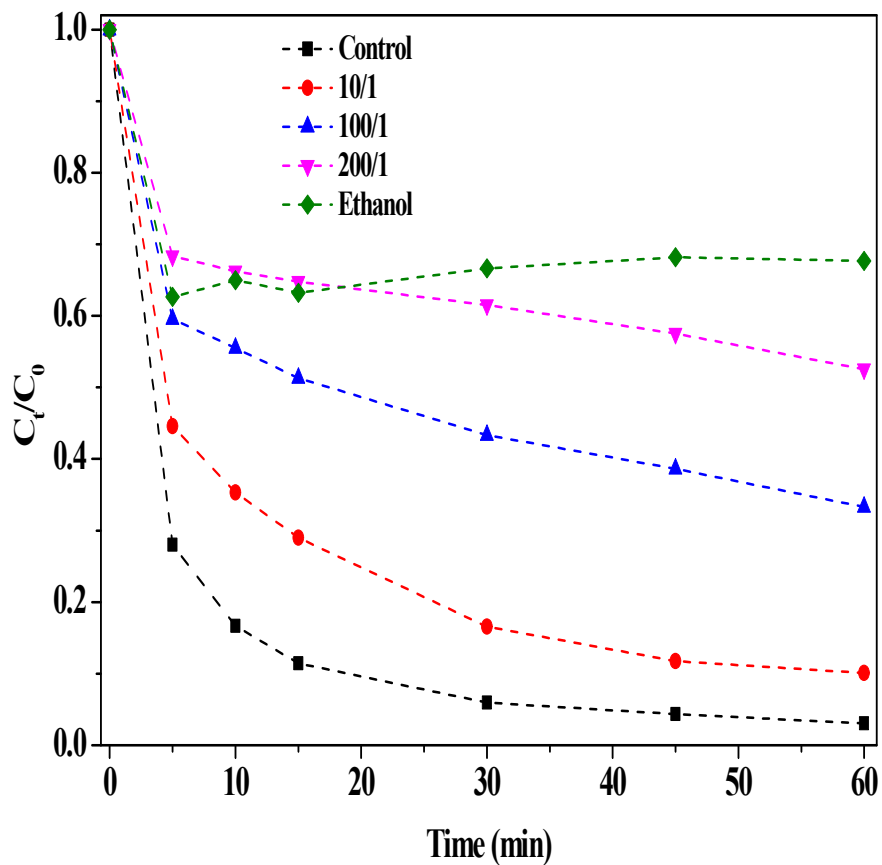

**Figure S13** Effect of concentrations of ethanol on the RhB degradation.

Reaction conditions:  $[\text{NaHCO}_3] = 10 \text{ mM}$ ,  $[\text{H}_2\text{O}_2] = 15 \text{ mM}$ ,  $[\text{O/g-C}_3\text{N}_4] = 0.8 \text{ g L}^{-1}$ ,  $[\text{RhB}] = 10 \text{ mg L}^{-1}$ ,  $25 \text{ }^\circ\text{C}$ ,  $\text{pH} \approx 8.4$ , 60 min,  $[\text{Ethanol}] = 0.15 \text{ M}$ ,  $1.5 \text{ M}$ ,  $3.0 \text{ M}$ , ethanol replacing of water, respectively.

**Figure S14**

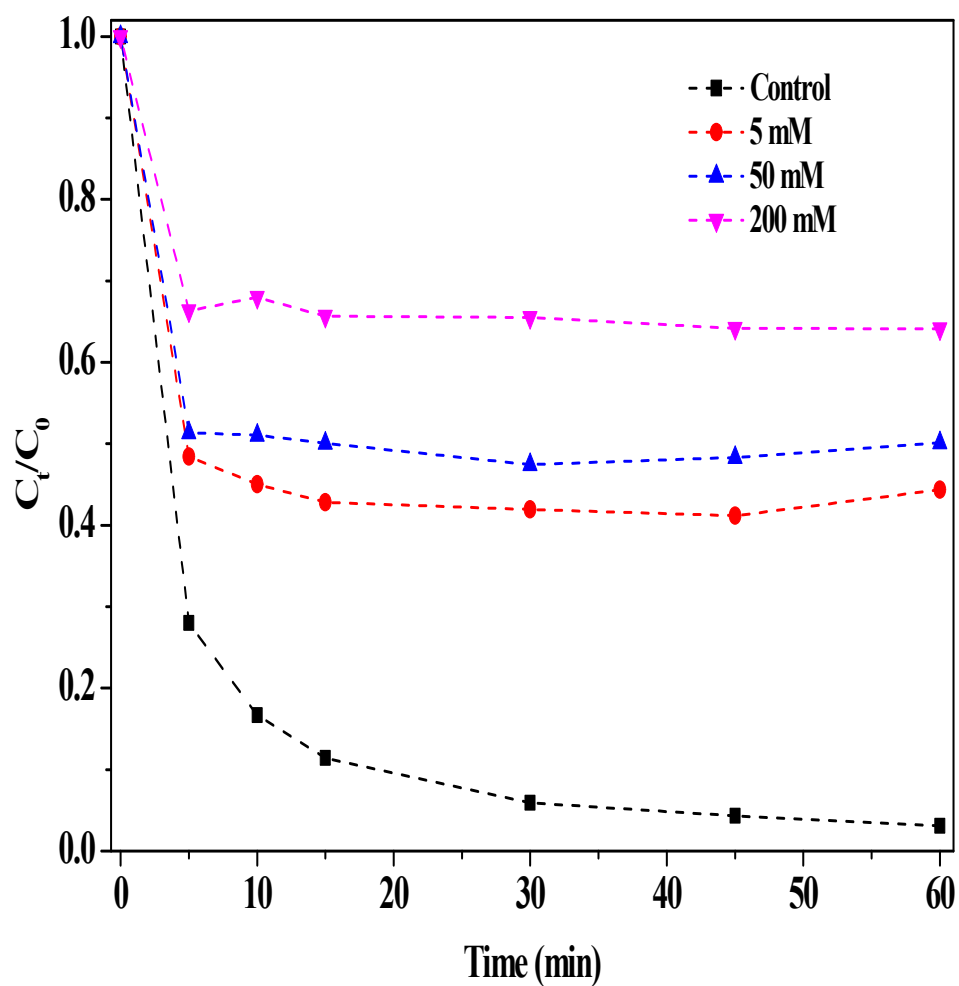

**Figure S14** Effect of concentration of Tiron on the RhB degradation.

Reaction conditions:  $[\text{NaHCO}_3] = 10 \text{ mM}$ ,  $[\text{H}_2\text{O}_2] = 15 \text{ mM}$ ,  $[\text{O/g-C}_3\text{N}_4] = 0.8 \text{ g L}^{-1}$ ,  $[\text{RhB}] = 10 \text{ mg L}^{-1}$ ,  $25 \text{ }^\circ\text{C}$ ,  $\text{pH} \approx 8.4$ , 60 min,  $[\text{Tiron}] = 5, 50$  and  $200 \text{ mM}$ , respectively.

**Figure S15**

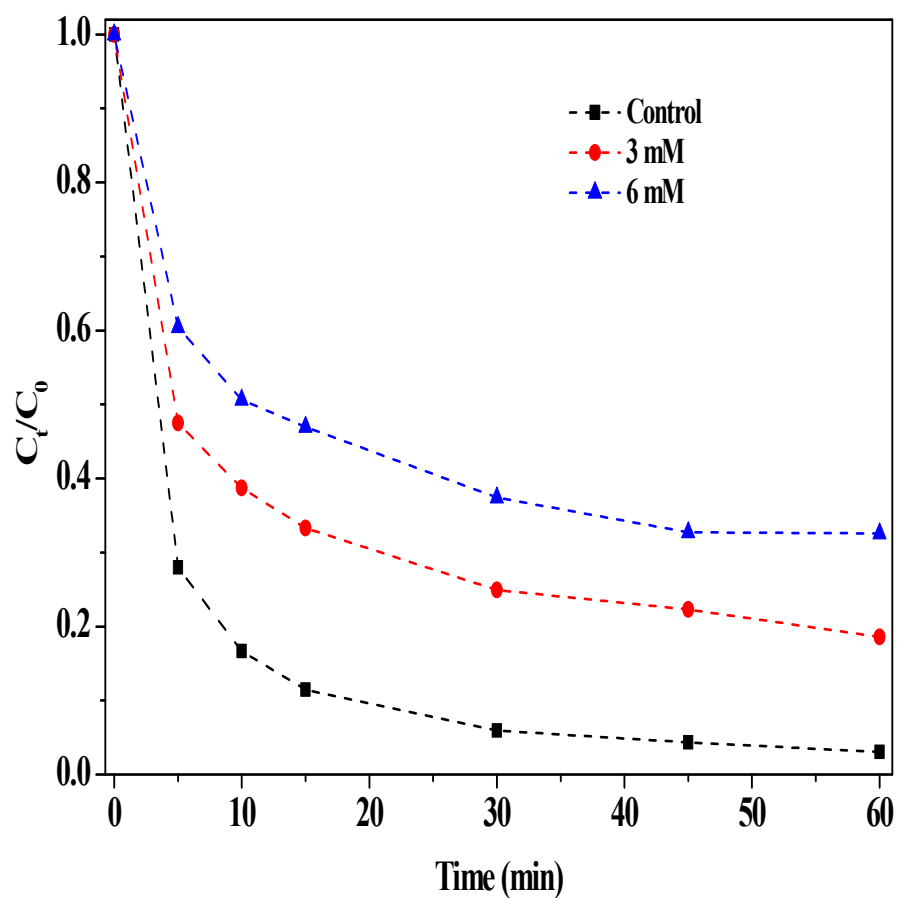

**Figure S15** Effect of concentration of benzoquinone (BQ) on the RhB degradation. Reaction conditions:  $[\text{NaHCO}_3] = 10 \text{ mM}$ ,  $[\text{H}_2\text{O}_2] = 15 \text{ mM}$ ,  $[\text{O/g-C}_3\text{N}_4] = 0.8 \text{ g L}^{-1}$ ,  $[\text{RhB}] = 10 \text{ mg L}^{-1}$ ,  $25 \text{ }^\circ\text{C}$ ,  $\text{pH} \approx 8.4$ , 60 min,  $[\text{BQ}] = 3$  and  $6 \text{ mM}$ , respectively.



**Figure S16**

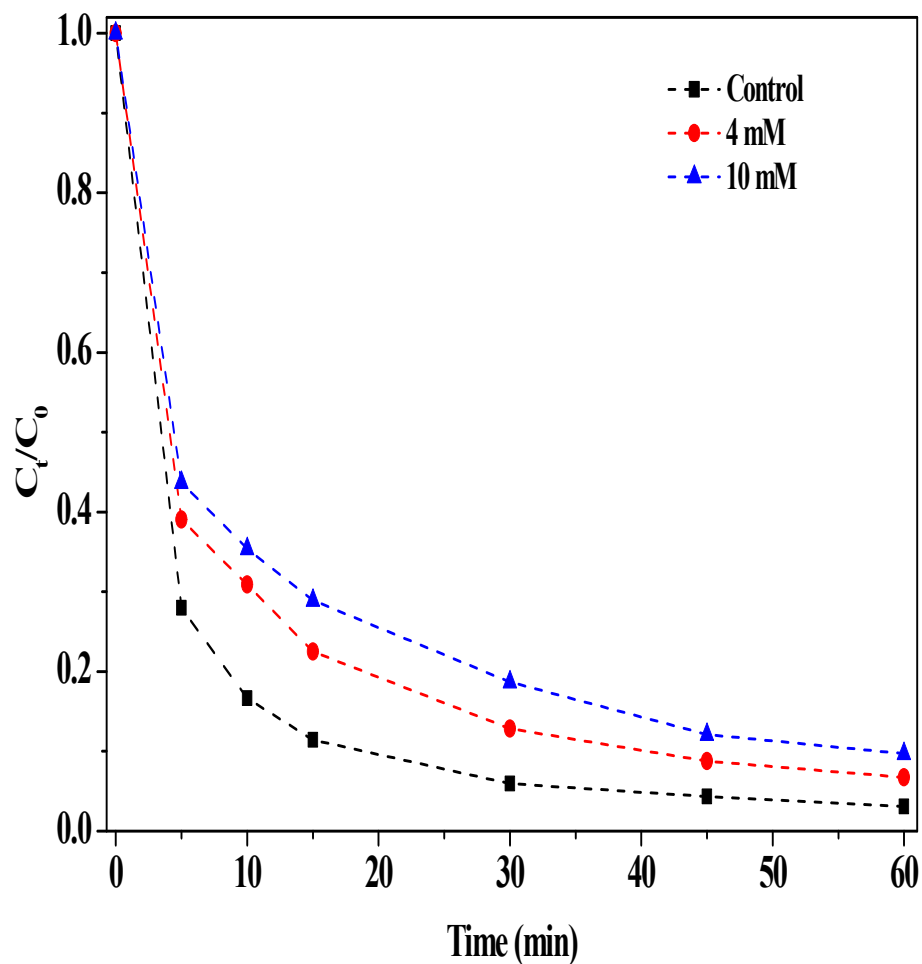

**Figure S16** Effect of concentration of  $\text{NaN}_3$  on the RhB degradation.

Reaction conditions:  $[\text{NaHCO}_3] = 10 \text{ mM}$ ,  $[\text{H}_2\text{O}_2] = 15 \text{ mM}$ ,  $[\text{O/g-C}_3\text{N}_4] = 0.8 \text{ g L}^{-1}$ ,  $[\text{RhB}] = 10 \text{ mg L}^{-1}$ ,  $25 \text{ }^\circ\text{C}$ ,  $\text{pH} \approx 8.4$ , 60 min,  $[\text{NaN}_3] = 4$  and 10 mM, respectively.

**Figure S17**

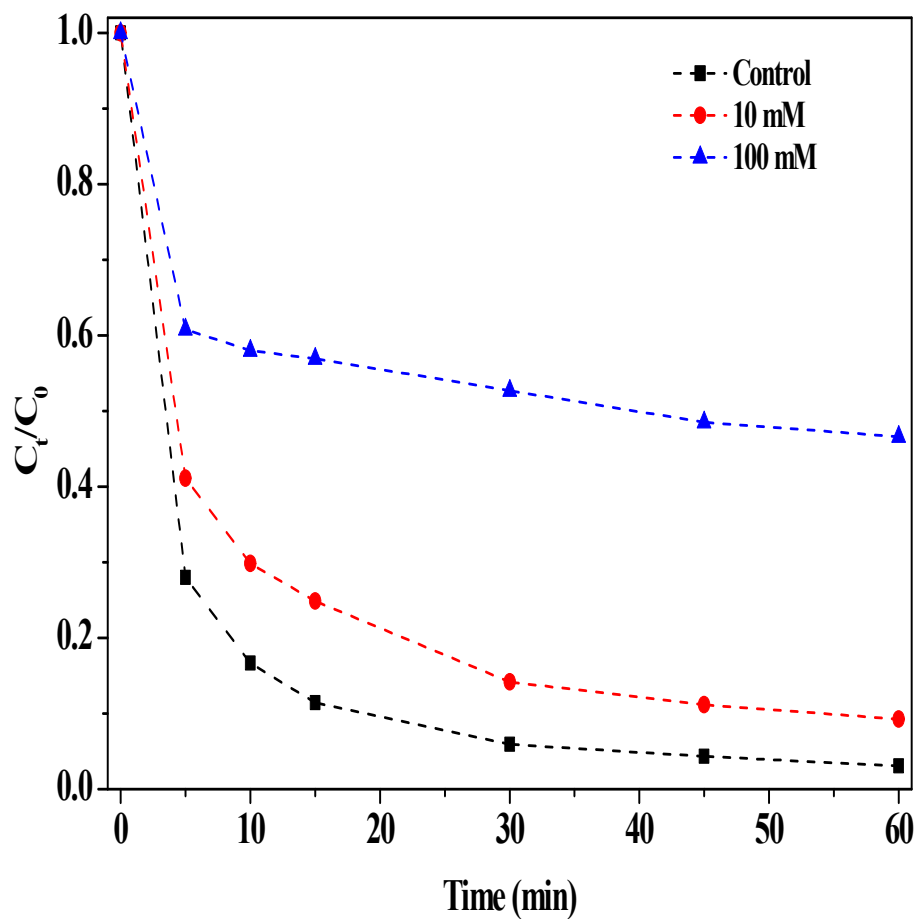

**Figure S17** Effect of concentrations of furfuryl alcohol (FFA) on the RhB degradation. Reaction conditions:  $[\text{NaHCO}_3] = 10 \text{ mM}$ ,  $[\text{H}_2\text{O}_2] = 15 \text{ mM}$ ,  $[\text{O/g-C}_3\text{N}_4] = 0.8 \text{ g L}^{-1}$ ,  $[\text{RhB}] = 10 \text{ mg L}^{-1}$ ,  $25 \text{ }^\circ\text{C}$ ,  $\text{pH} \approx 8.4$ ,  $60 \text{ min}$ ,  $[\text{FFA}] = 10$  and  $100 \text{ mM}$ , respectively.

**Figure S18**

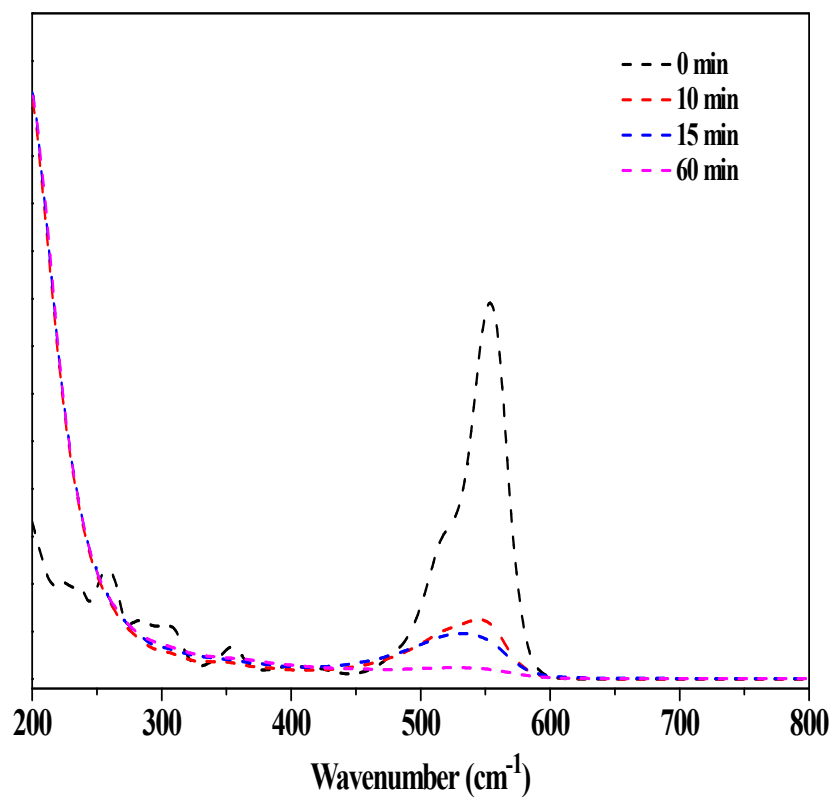

**Figure S18** The degradation for RhB with the increasing time from UV-vis results.

**Figure S19**

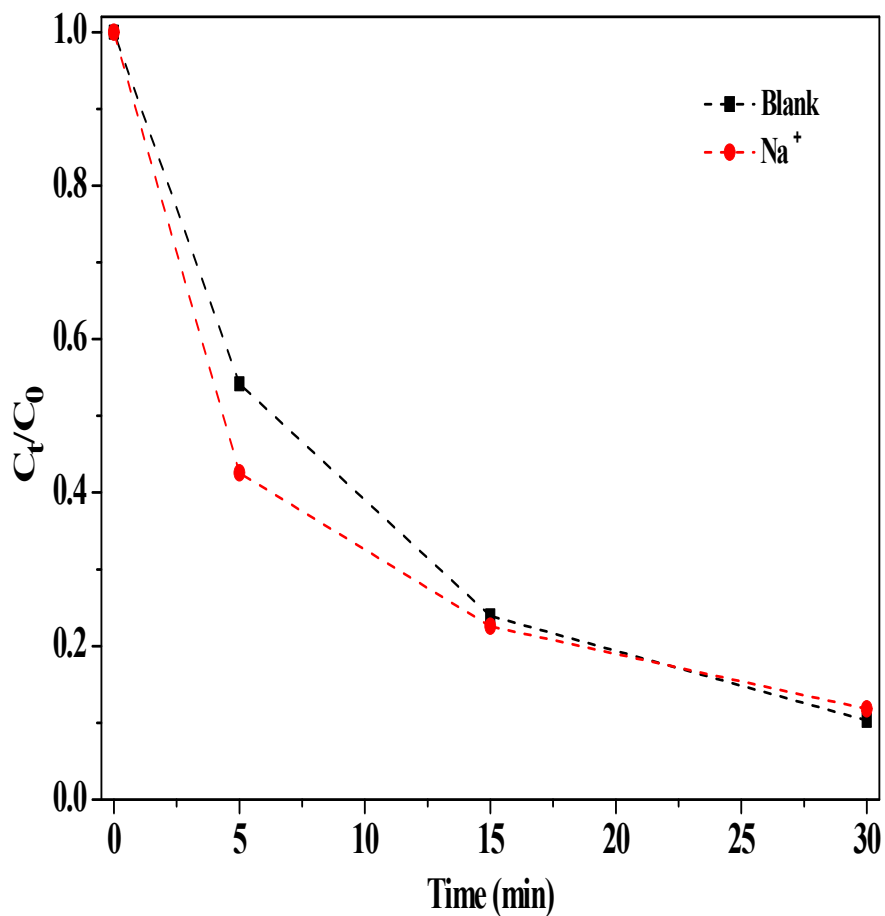

**Figure S19** The effect of  $Na^+$  over different catalysts for the RhB degradation. Reaction conditions:  $[NaHCO_3] = 10 \text{ mM}$ ,  $[H_2O_2] = 15 \text{ mM}$ ,  $[Na\text{-O/g-C}_3\text{N}_4 \text{ or O/g-C}_3\text{N}_4] = 0.8 \text{ g L}^{-1}$ ,  $[RhB] = 10 \text{ mg L}^{-1}$ ,  $25 \text{ }^\circ\text{C}$ ,  $\text{pH} \approx 8.4$  and 30 min.

**Figure S20**

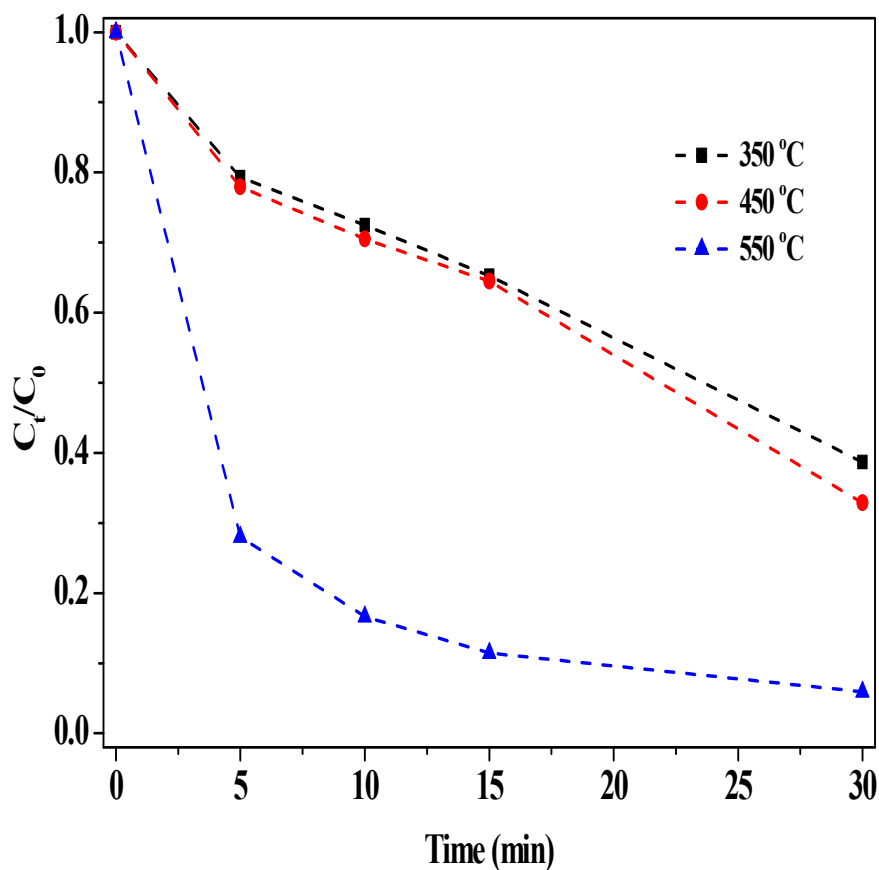

**Figure S20** Effect of calcination temperature of O/g-C<sub>3</sub>N<sub>4</sub> on the RhB degradation. Reaction conditions: [NaHCO<sub>3</sub>] = 10 mM, [H<sub>2</sub>O<sub>2</sub>] = 15 mM, [O/g-C<sub>3</sub>N<sub>4</sub>] = 0.8 g L<sup>-1</sup>, [RhB] = 10 mg L<sup>-1</sup>, 25 °C, pH ≈ 8.4 and 60 min.

**Table S1** Results of the content in g-C<sub>3</sub>N<sub>4</sub> and O/g-C<sub>3</sub>N<sub>4</sub> catalysts from element analysis.

| Catalysts                         | C(wt%) | N(wt%) | O(wt%) | mol(C)/(N) |
|-----------------------------------|--------|--------|--------|------------|
| g-C <sub>3</sub> N <sub>4</sub>   | 36.39  | 62.49  | 1.13   | 0.68       |
| O/g-C <sub>3</sub> N <sub>4</sub> | 38.77  | 59.20  | 2.02   | 0.76       |

**Table S2** The results of ratio of N(sp<sup>2</sup>) and N(sp<sup>3</sup>) and degradation of RhB in 30 min.

| Catalysts                                 | N(sp <sup>2</sup> )/N(sp <sup>3</sup> ) | Degradation efficiency(%) |
|-------------------------------------------|-----------------------------------------|---------------------------|
| O/g-C <sub>3</sub> N <sub>4</sub> -350 °C | 1.98                                    | 61.3                      |
| O/g-C <sub>3</sub> N <sub>4</sub> -450 °C | 2.06                                    | 67.1                      |
| O/g-C <sub>3</sub> N <sub>4</sub> -550 °C | 1.74                                    | 94.1                      |
